# Supplementary material
Source: bioRxiv or medRxiv preprint supplement (http://biorxiv.org/highwire/filestream/133573/field_highwire_adjunct_files/8/319723-6.pdf)
Supplement: Supplementary file [file 319723-6.pdf]

Burkholderia  
cepacia L06  
chr. 1

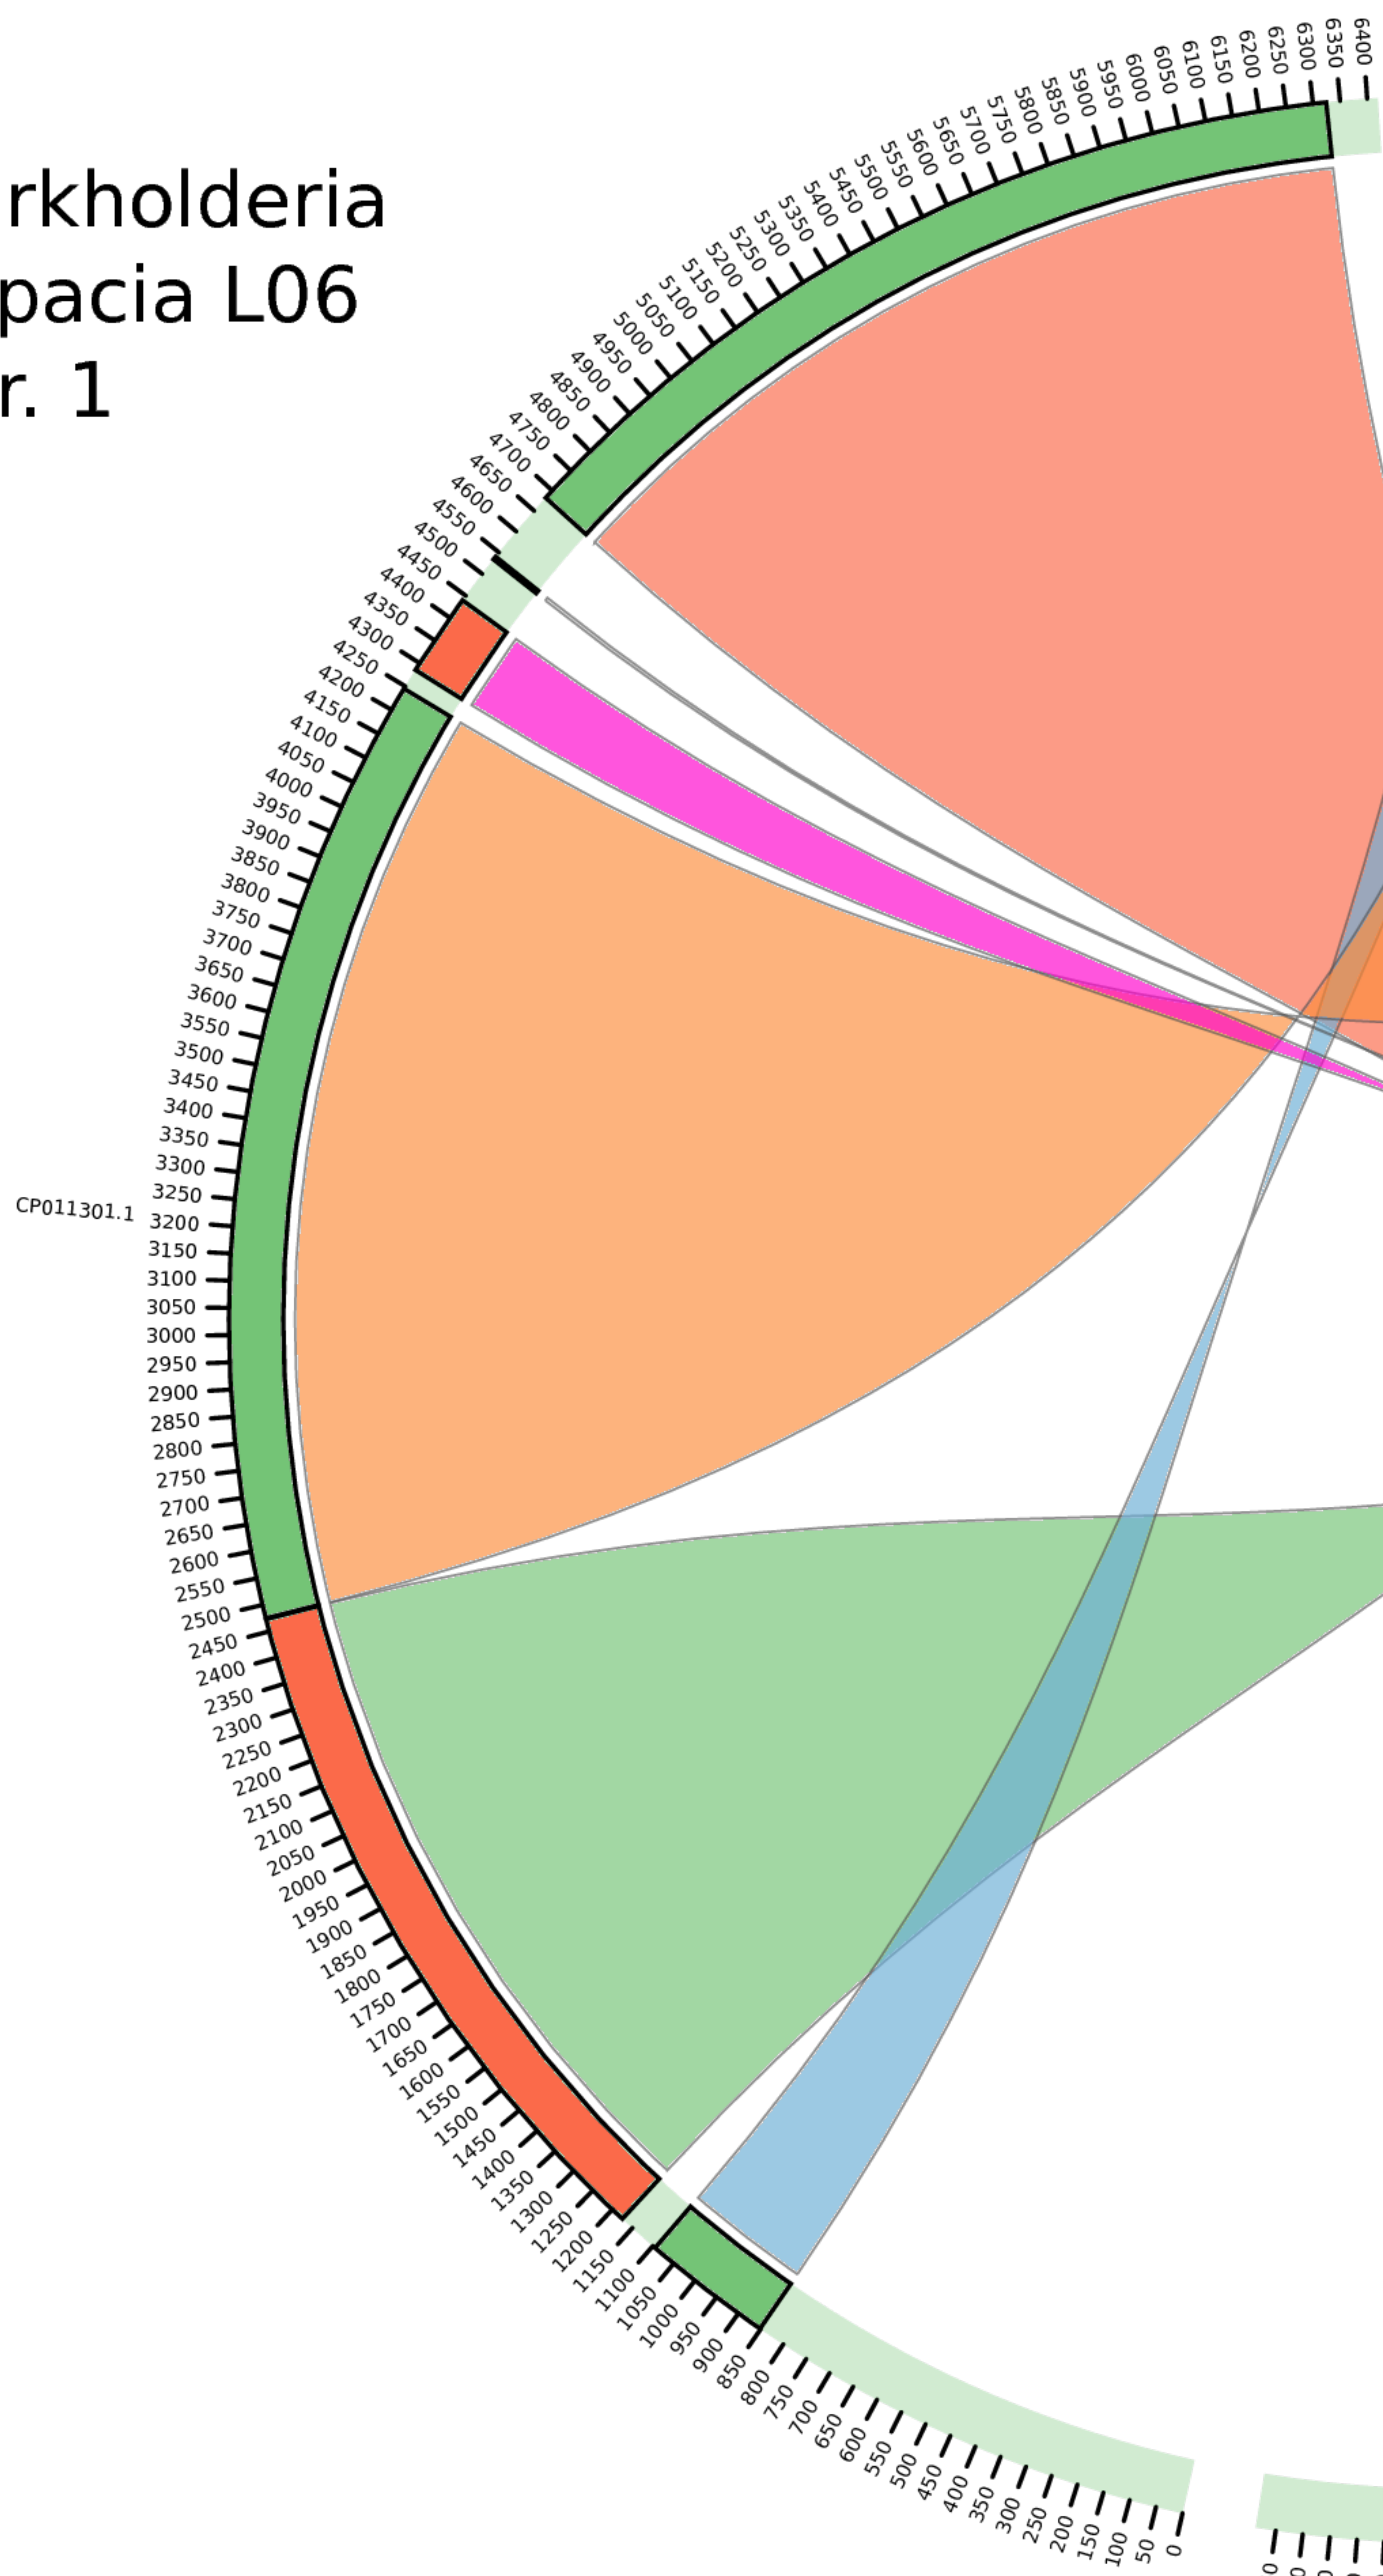

Burkholderia sp.  
383 chr.1

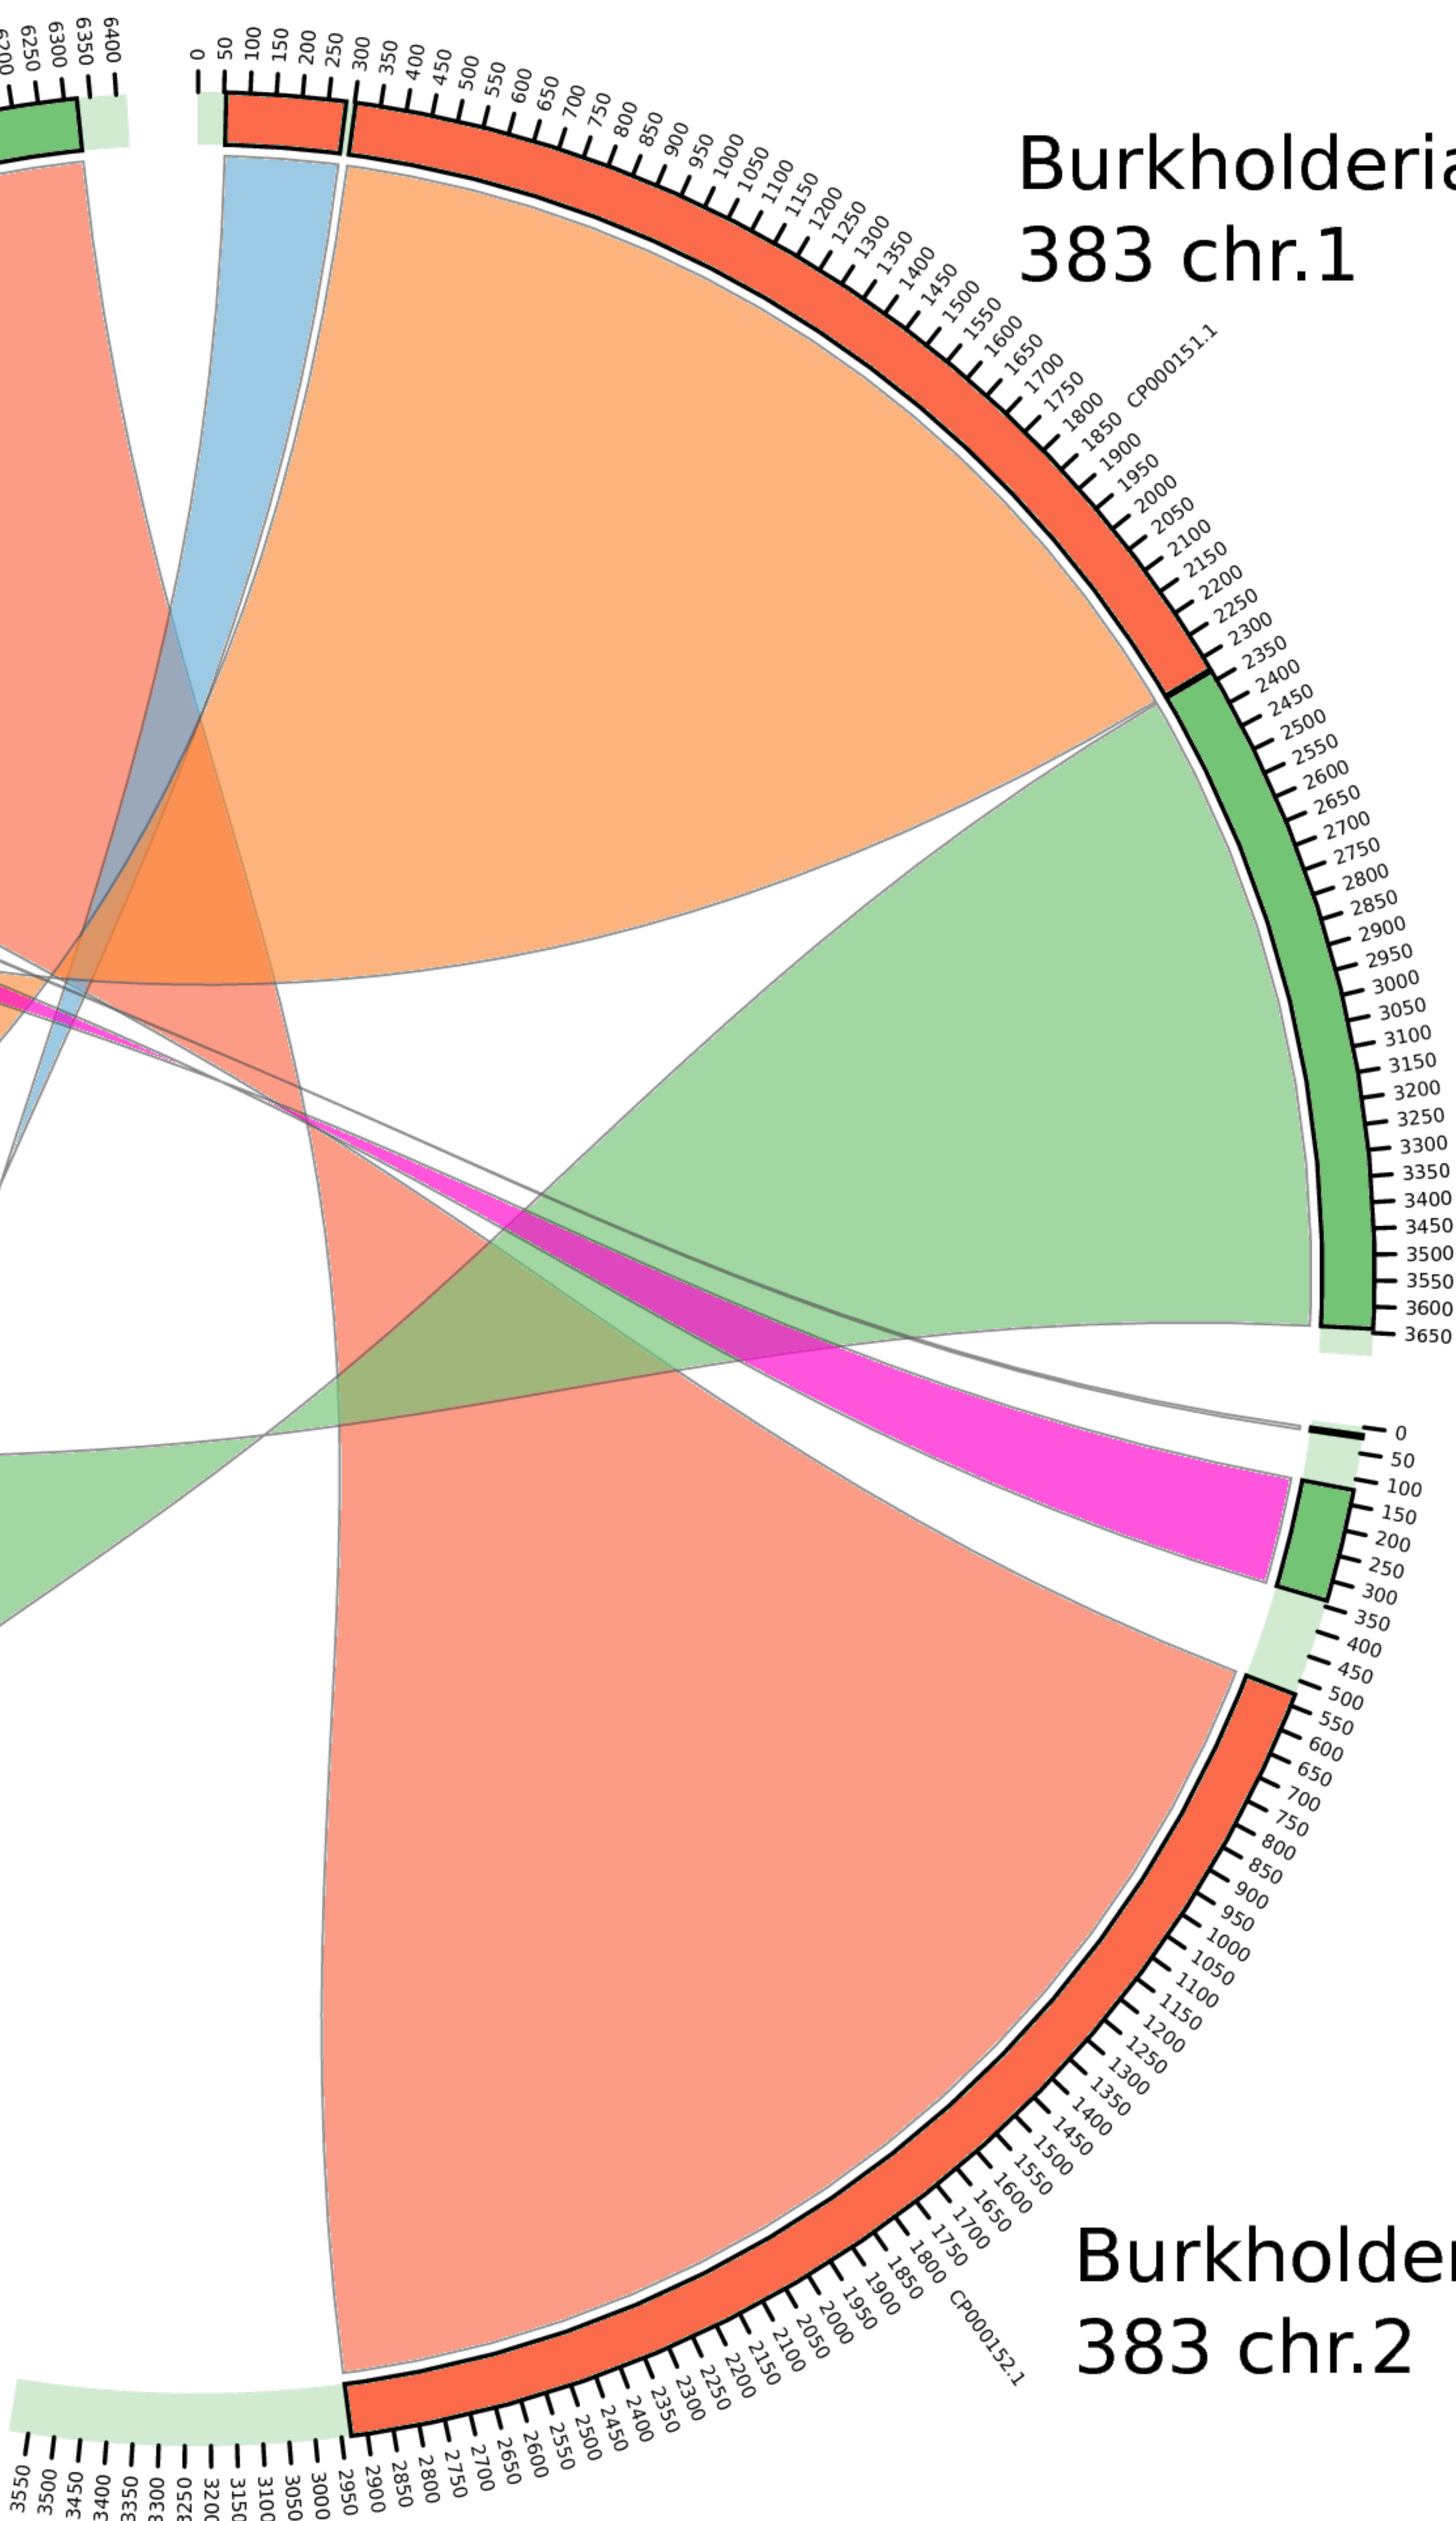

Burkholderia sp.  
383 chr.2

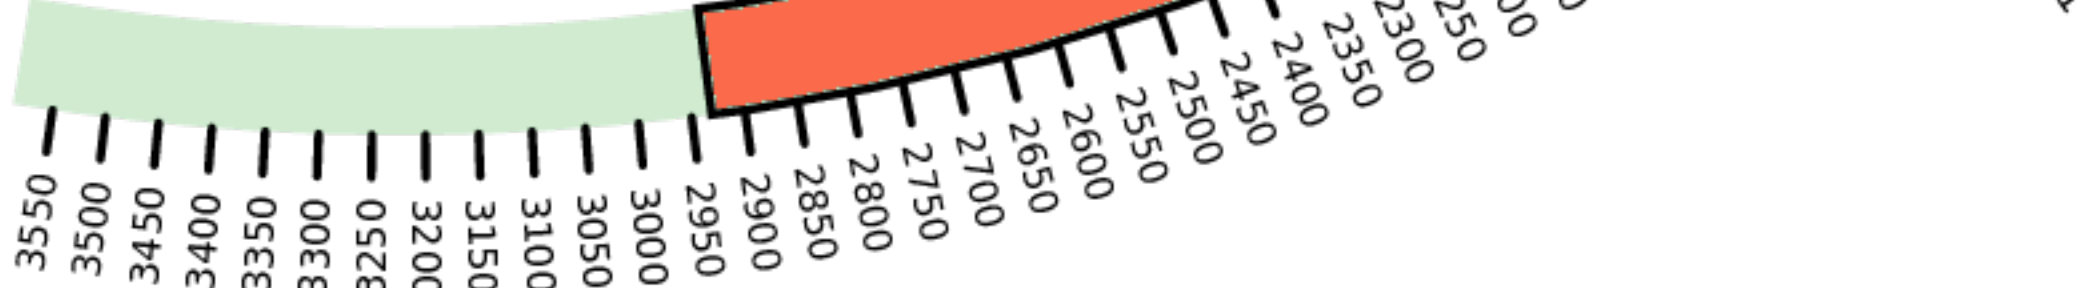

Burkholderia sp. 383  
chr2

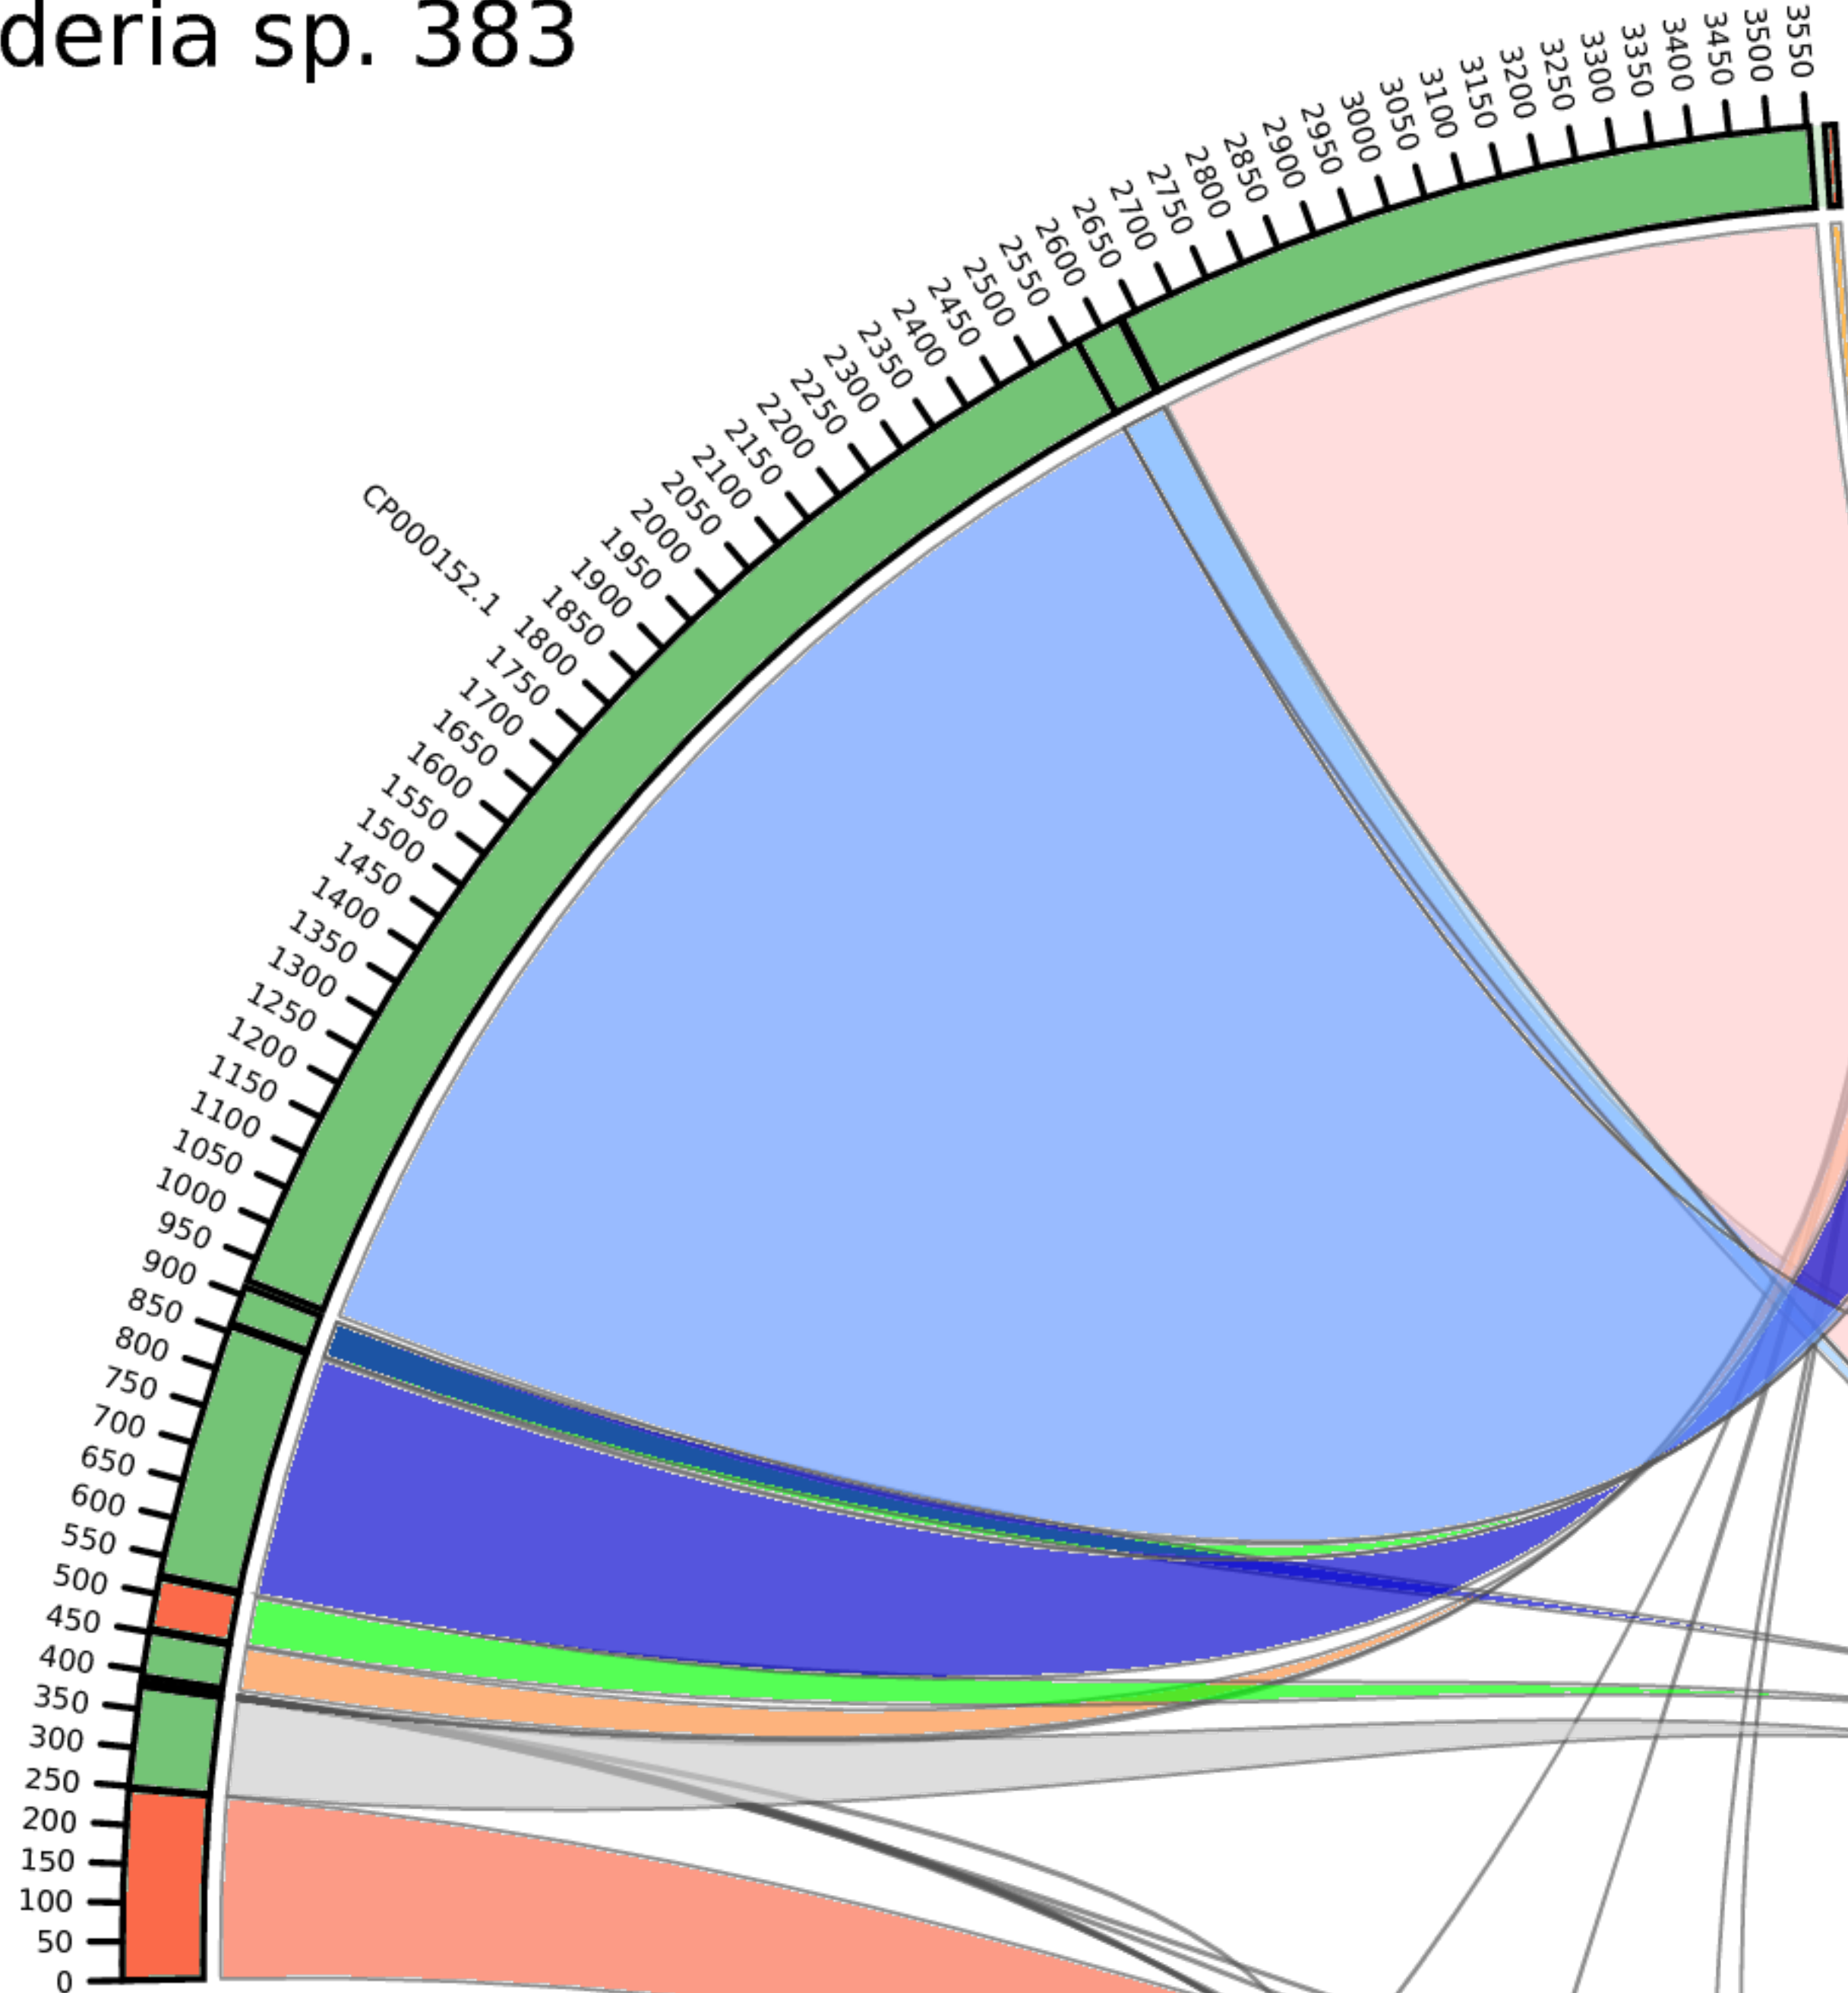

Burkholderia contaminans  
strain MS14 chr1

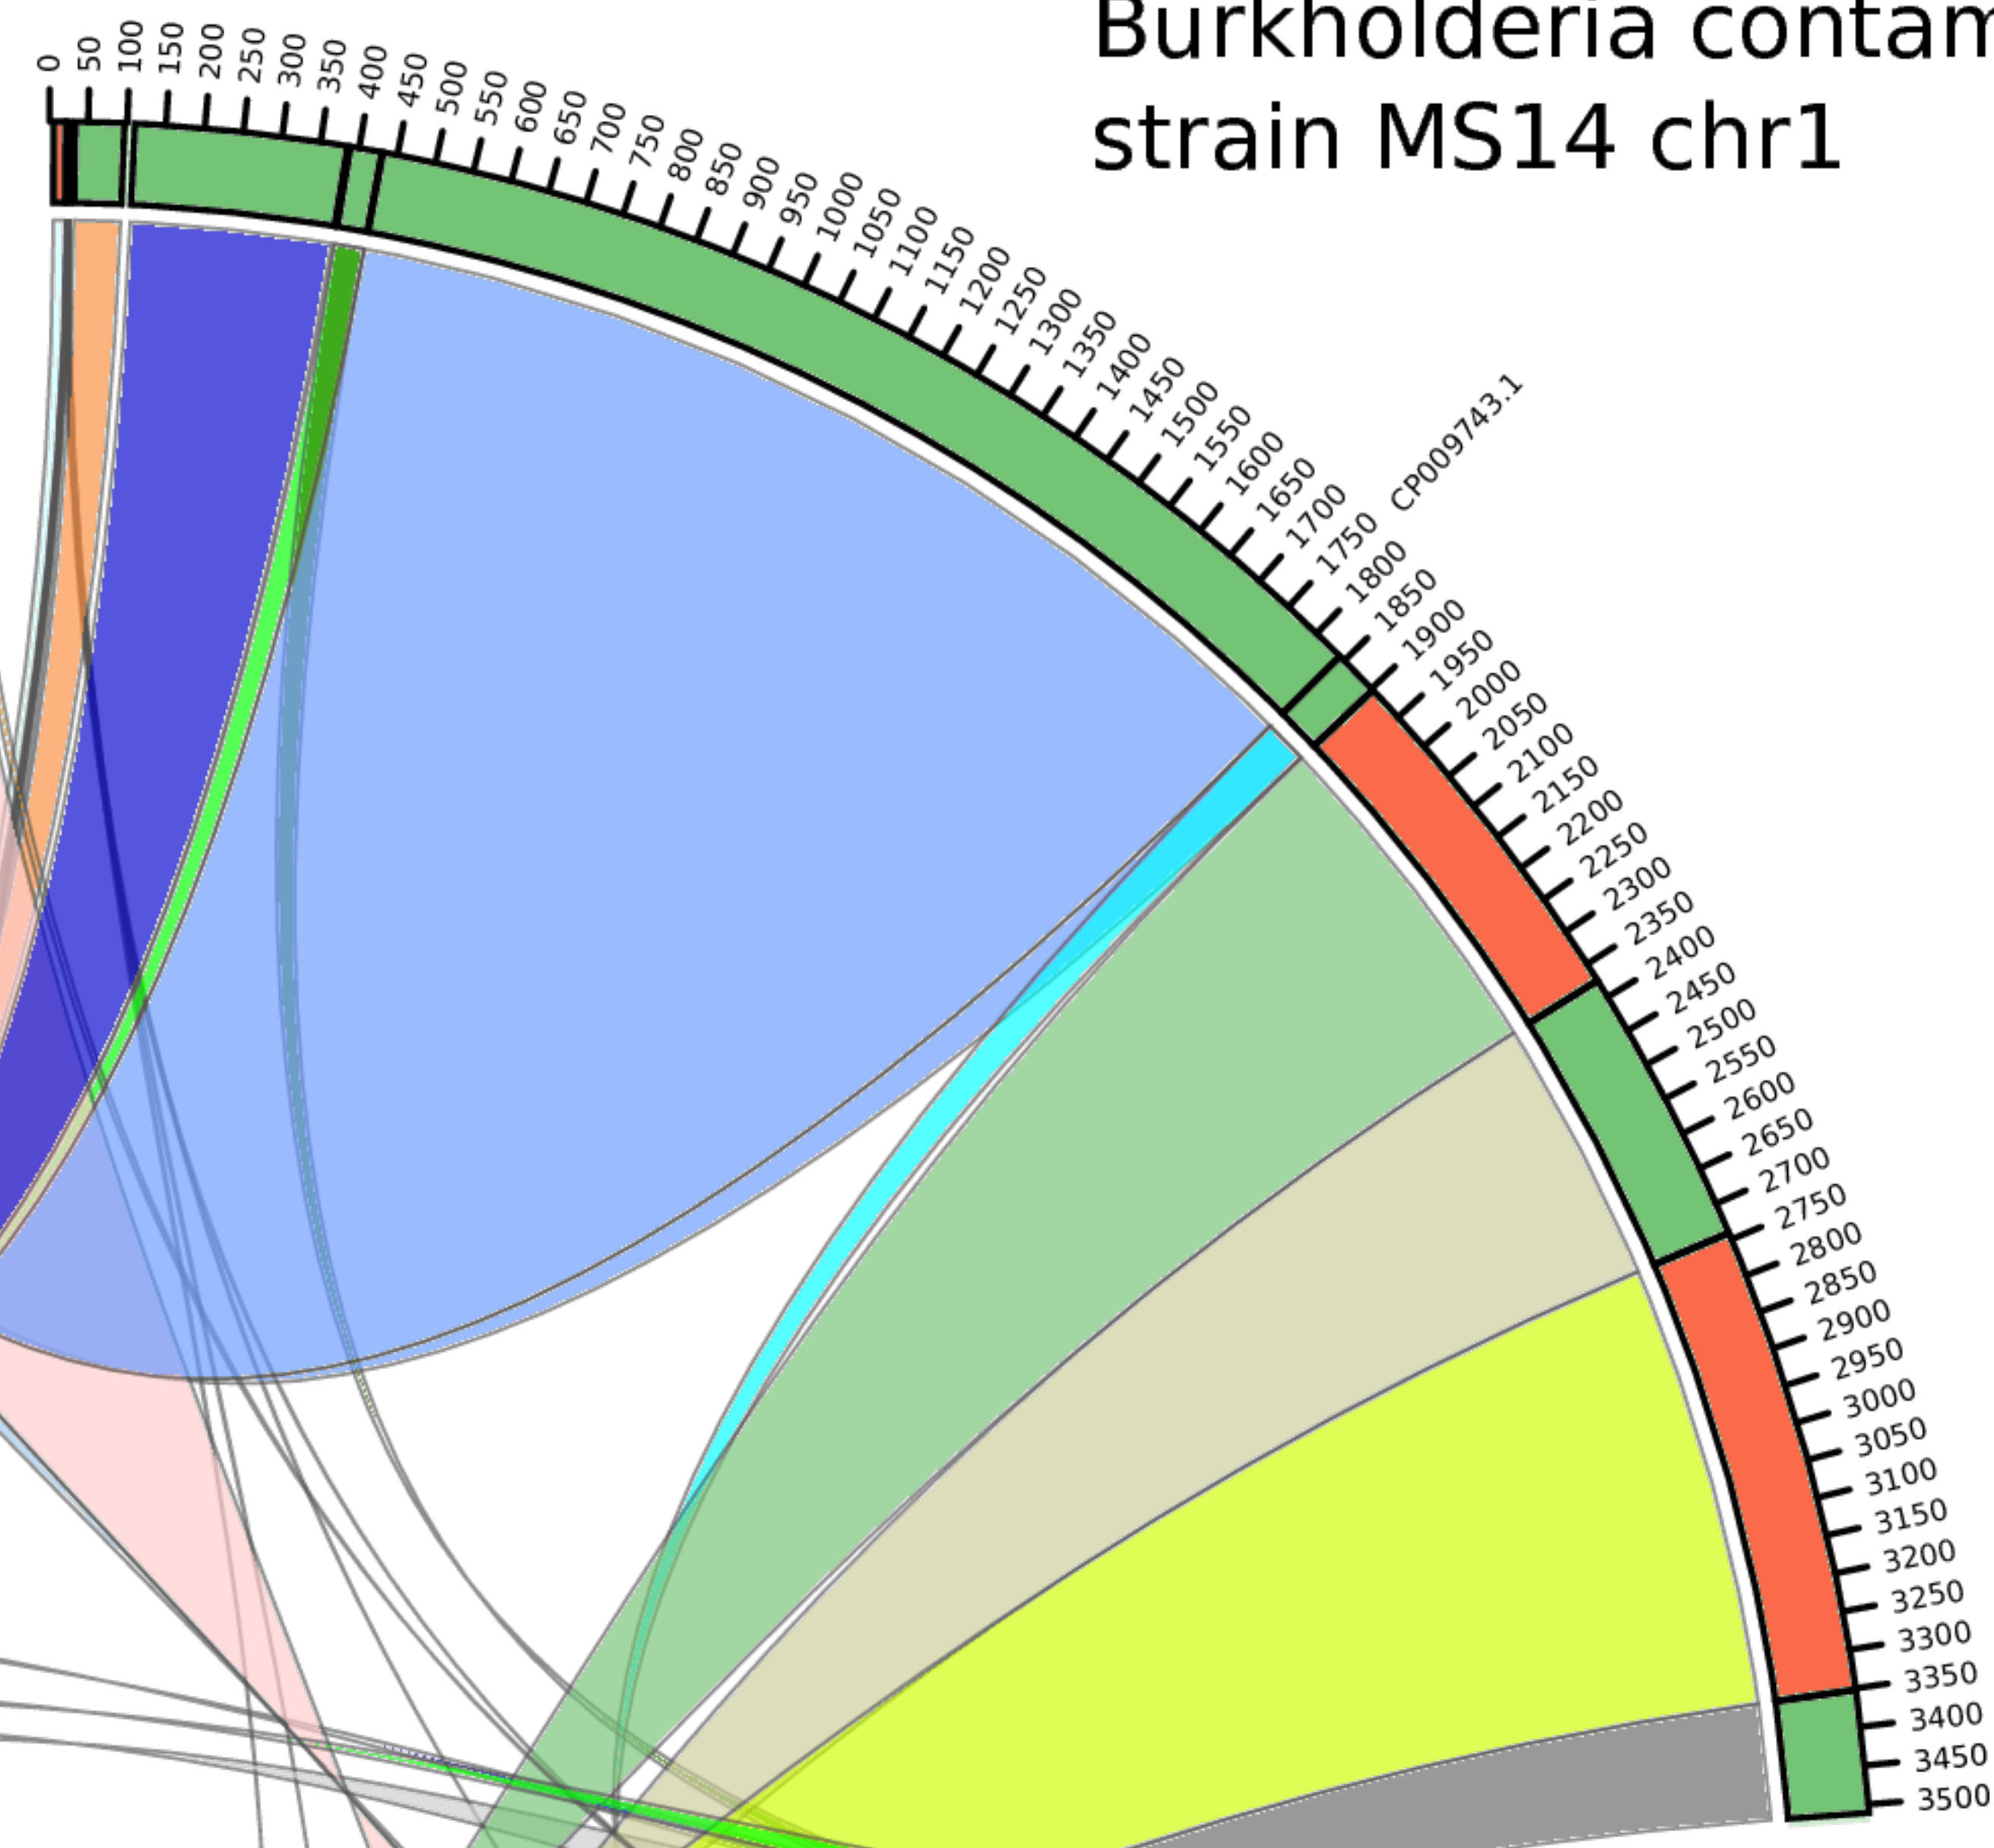

Burkholderia sp. 383  
chr1

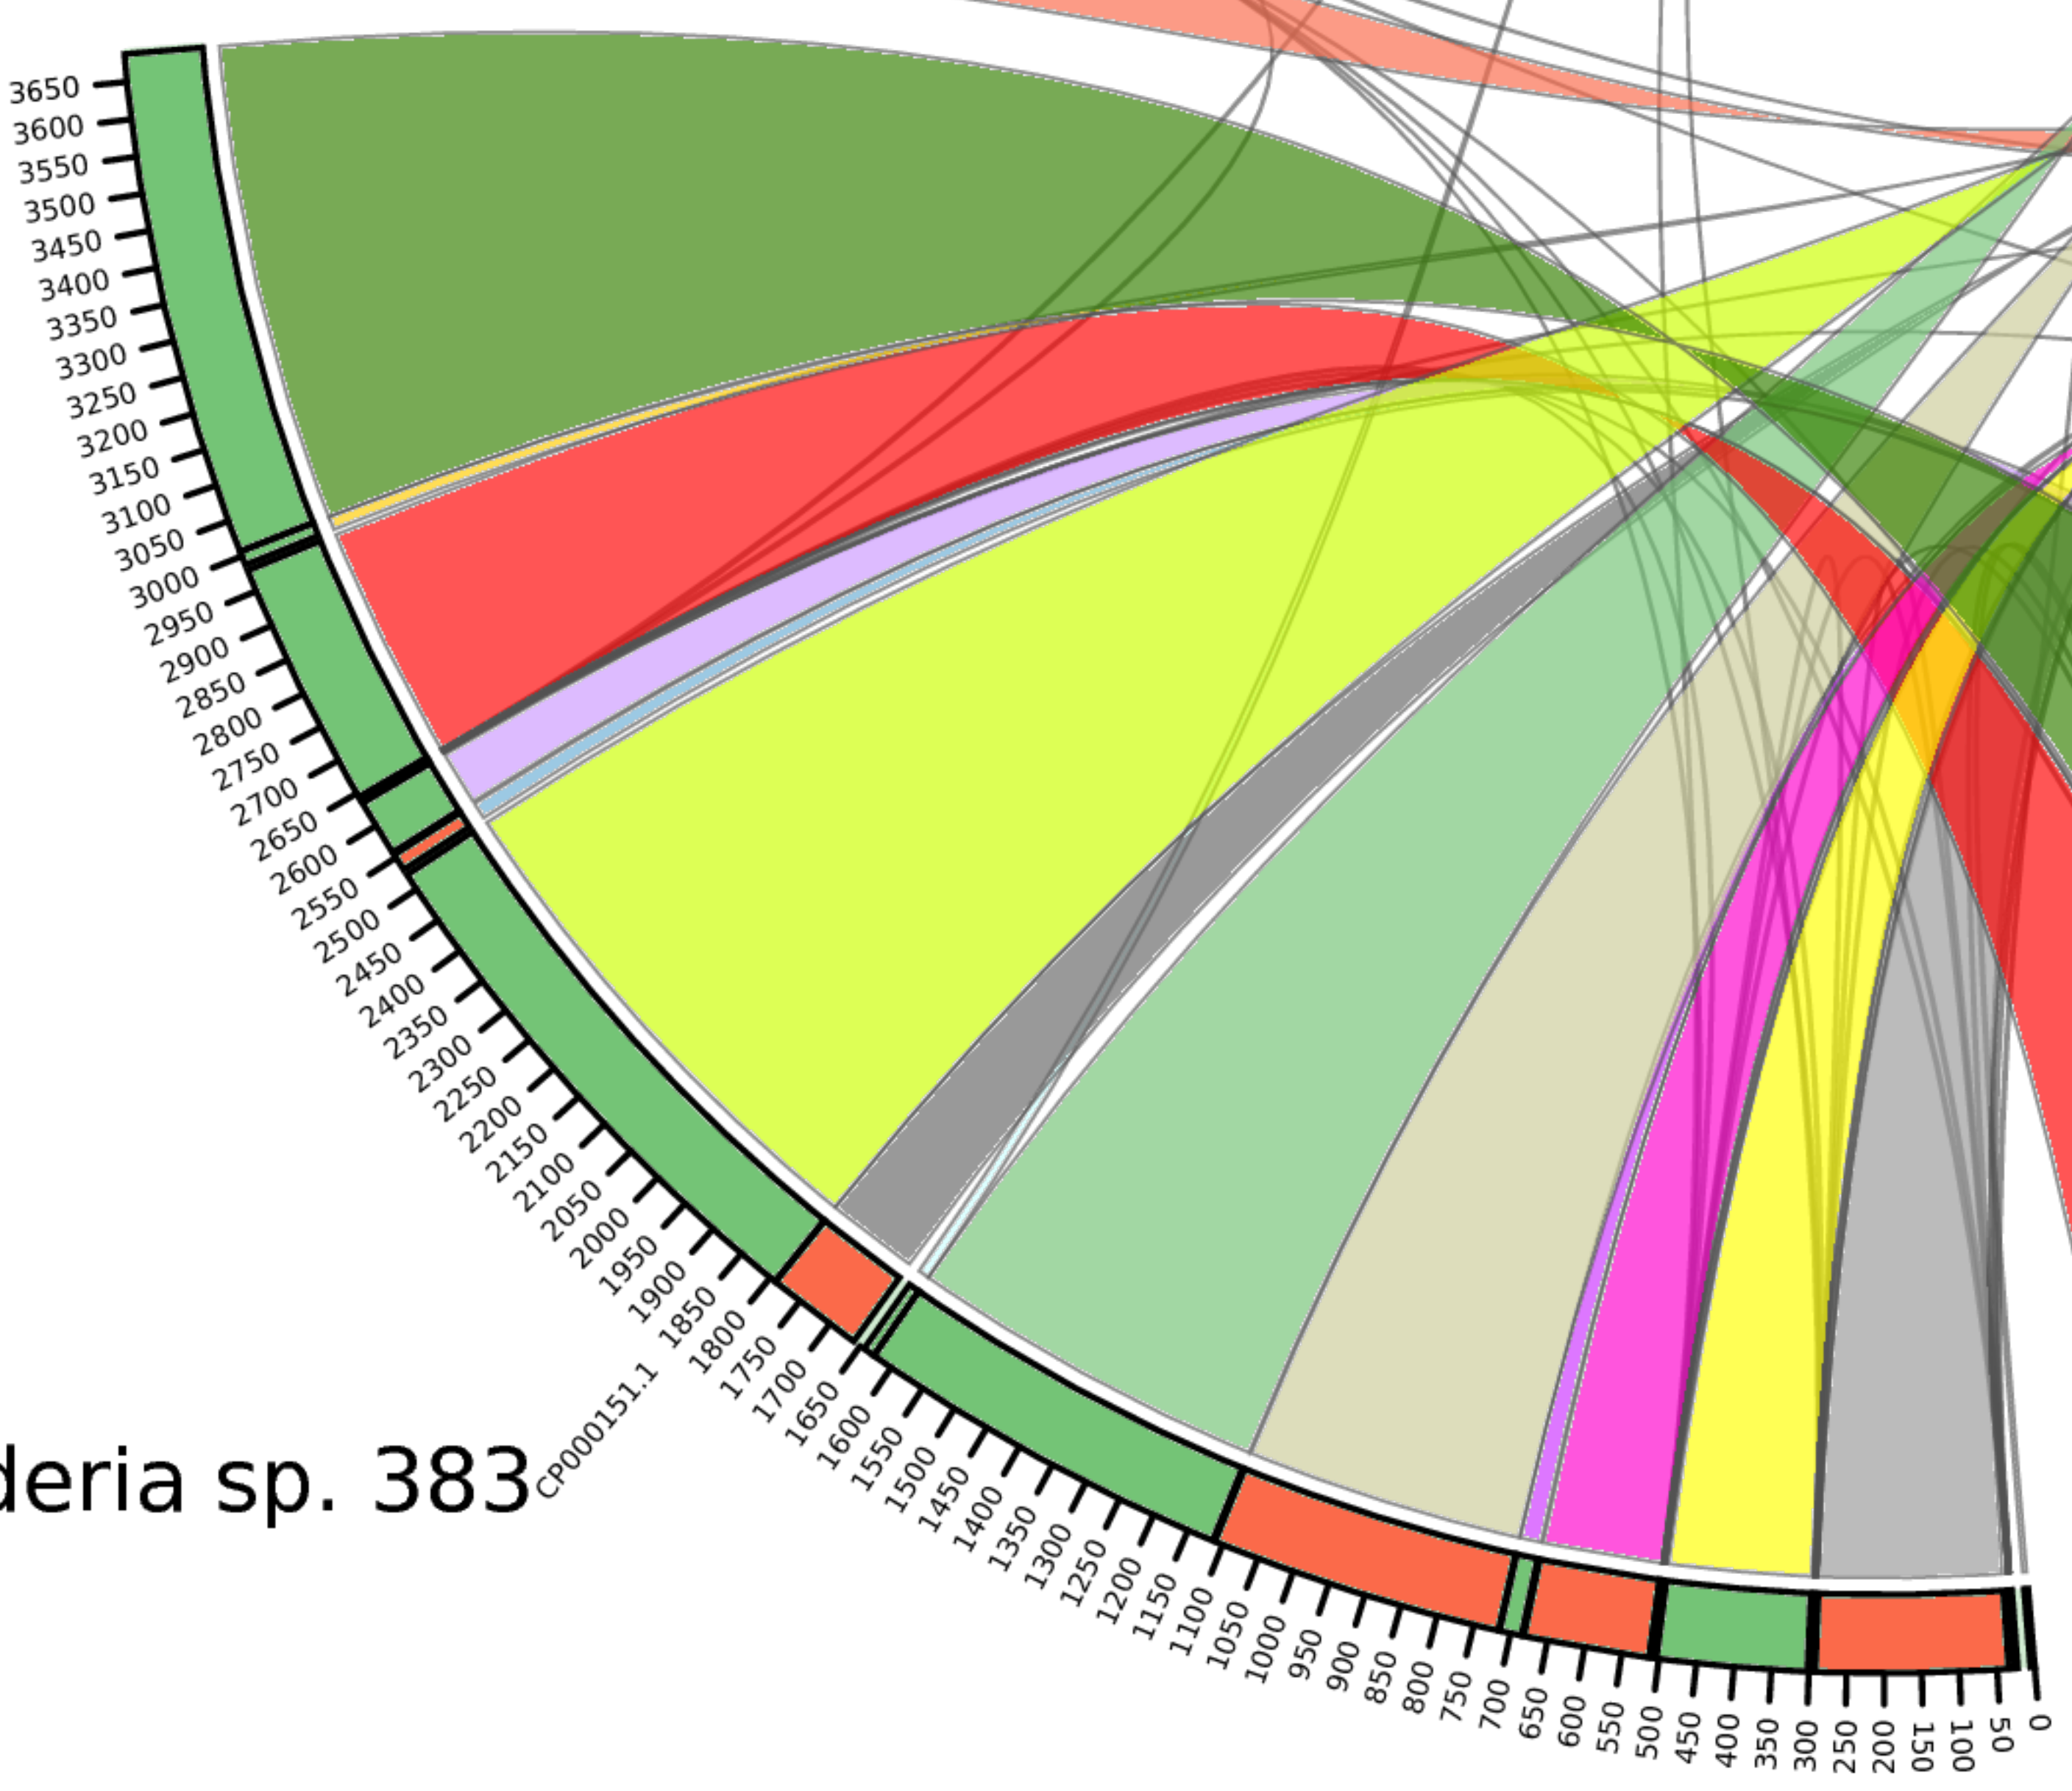

Burkholderia contaminans  
strain MS14 chr2

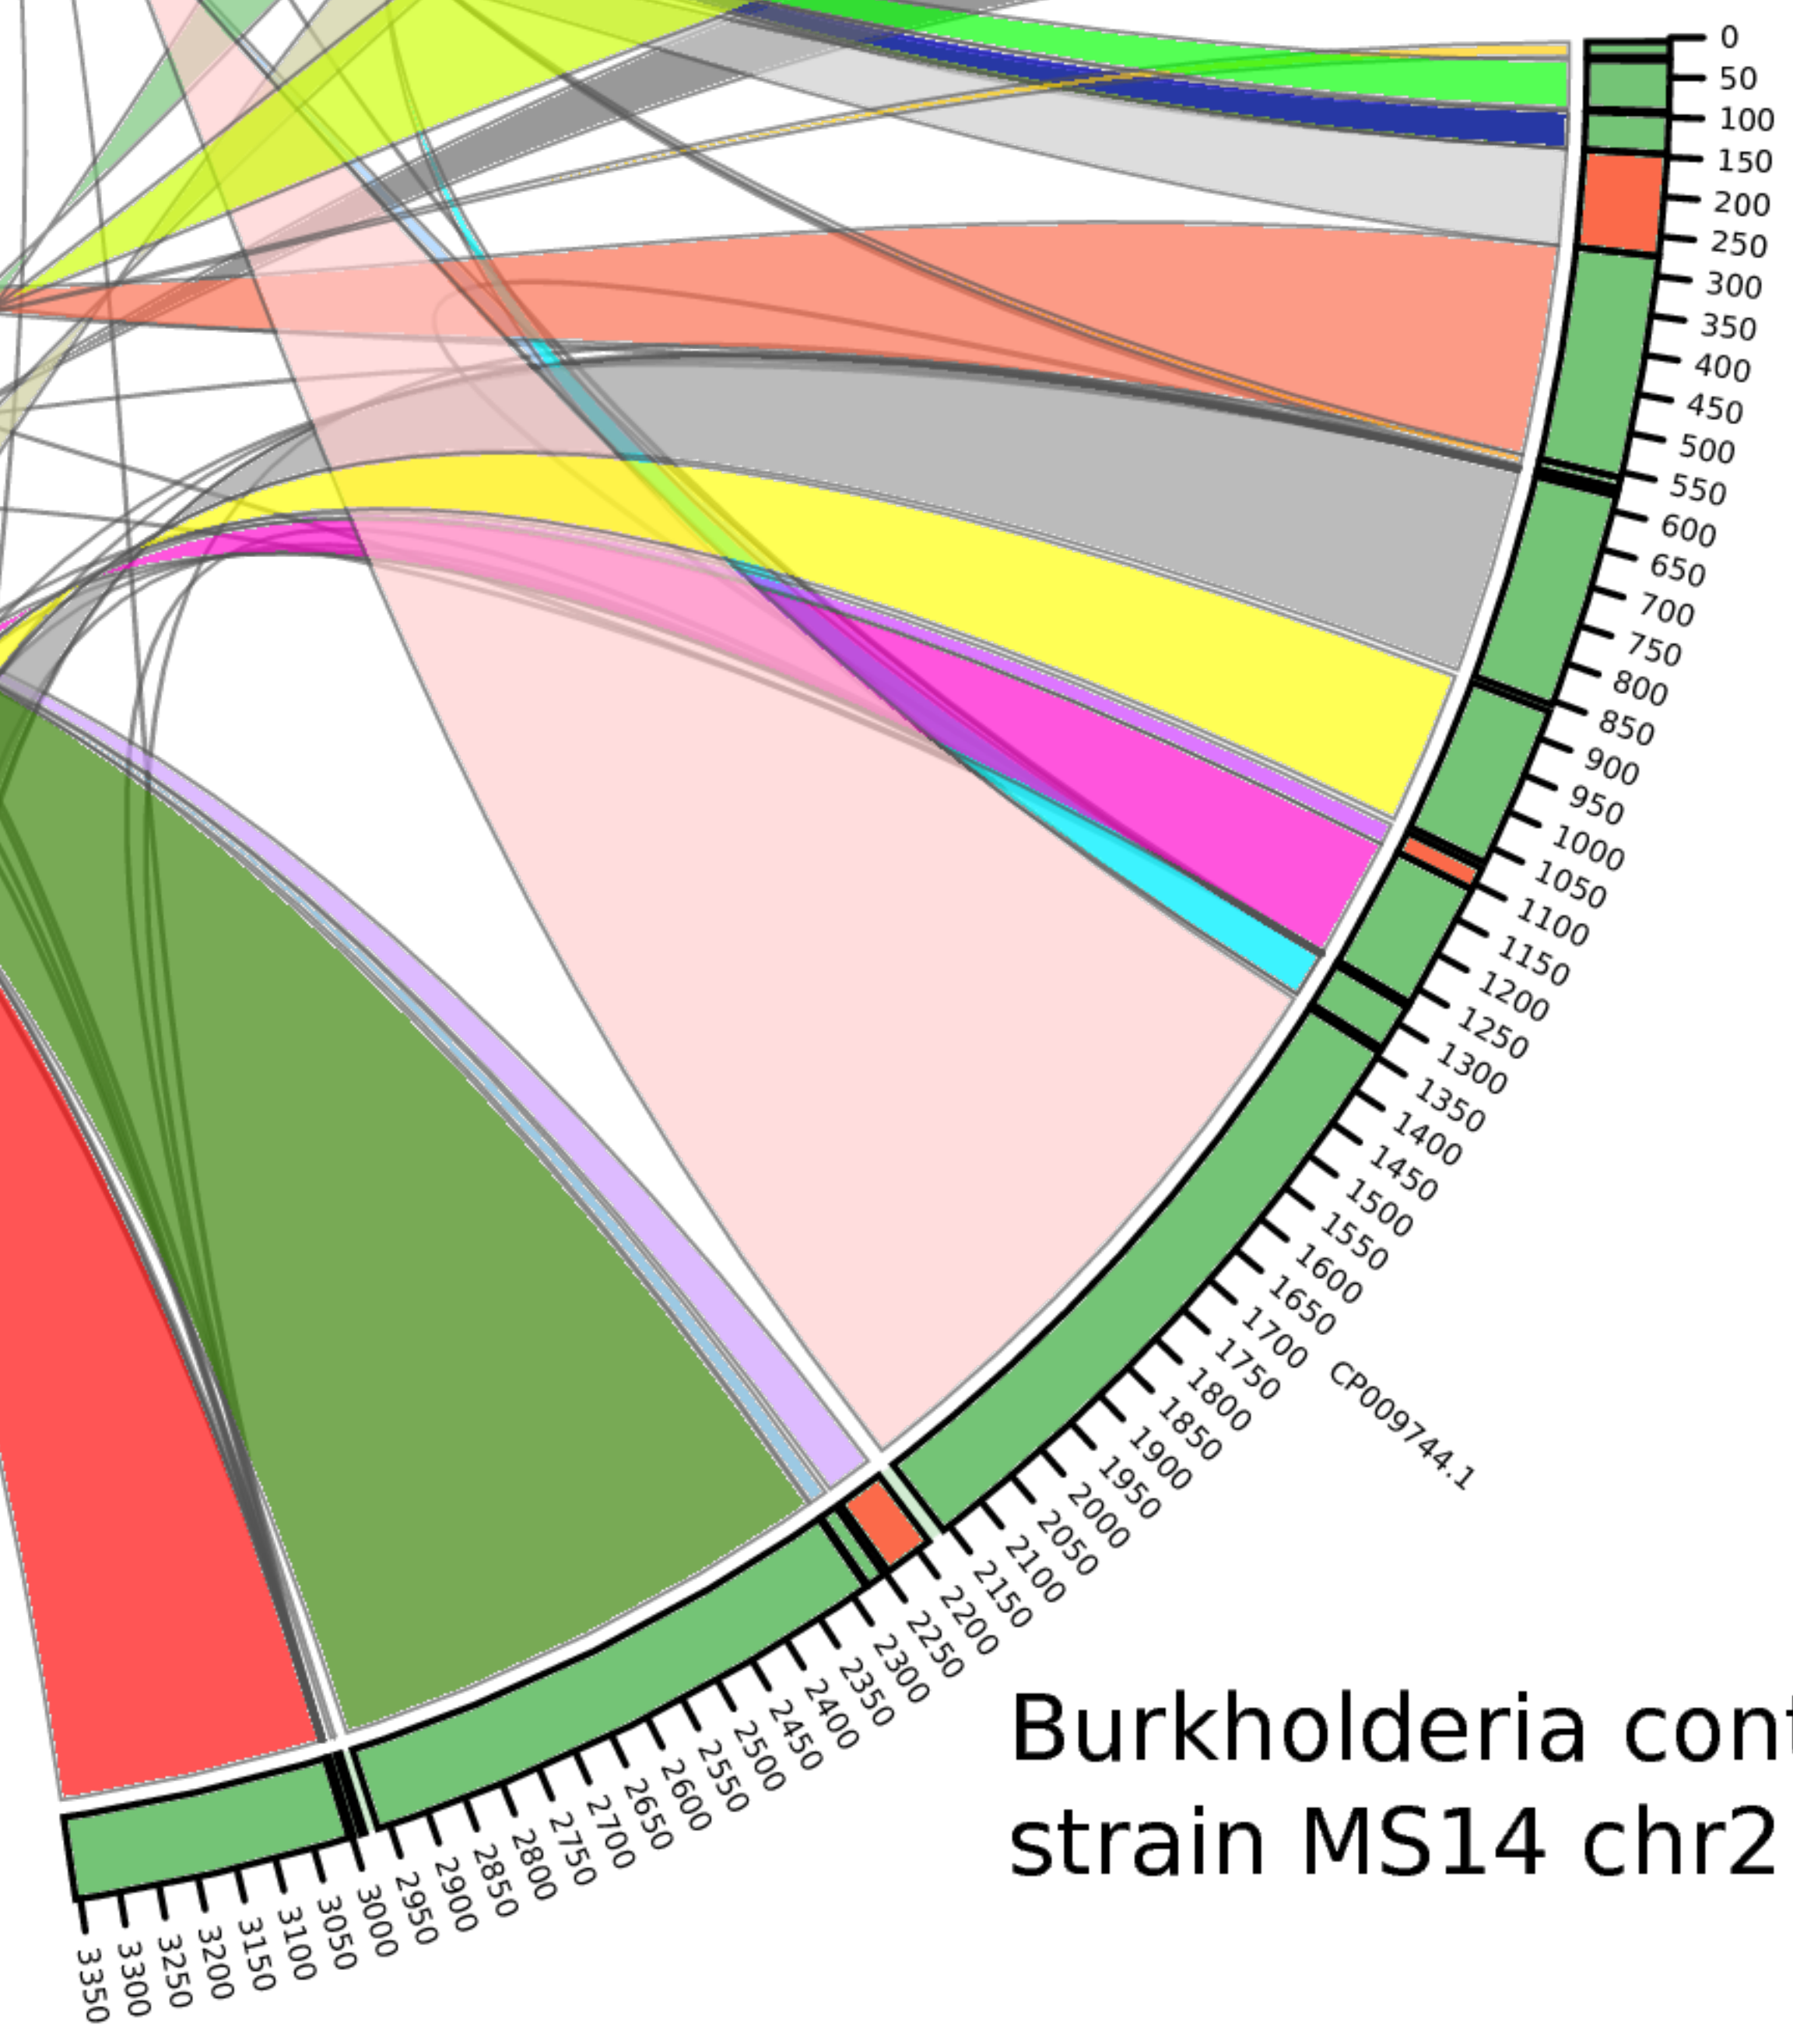

Burkholderia  
cenocepacia  
895 chr1

Burkholderia  
sp. 383 chr. 1

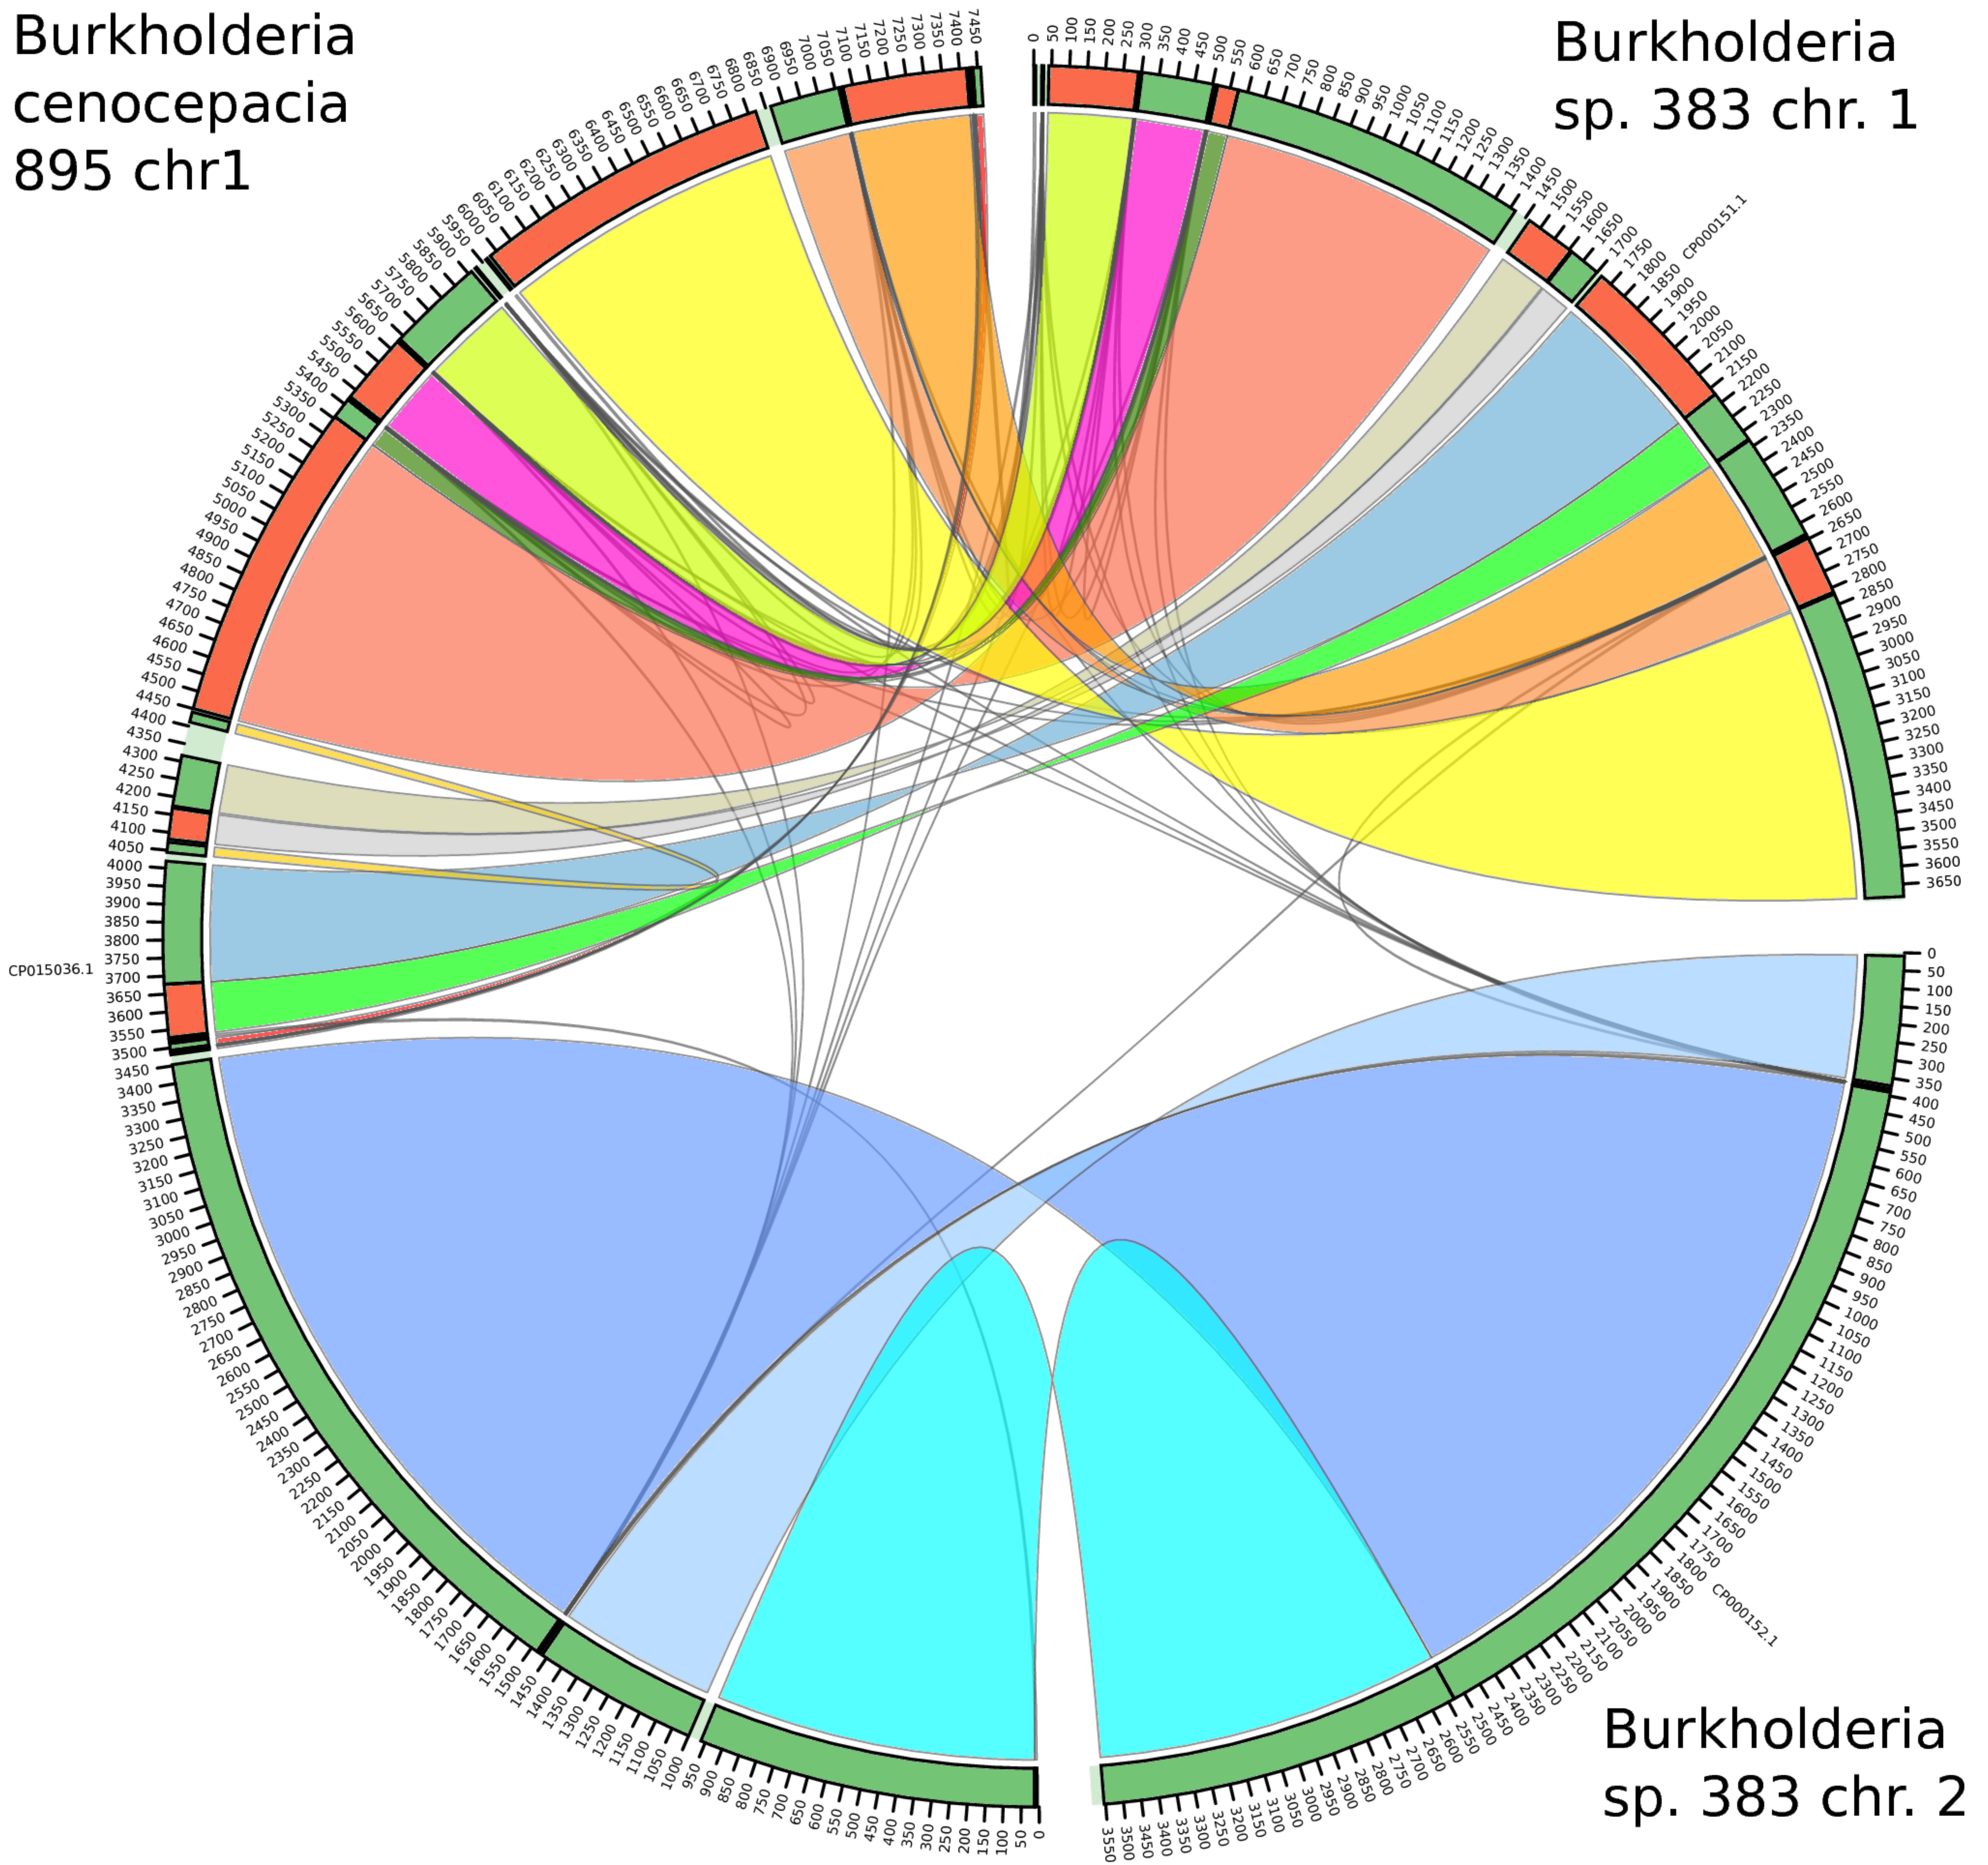

Burkholderia  
cenocepacia strain 895

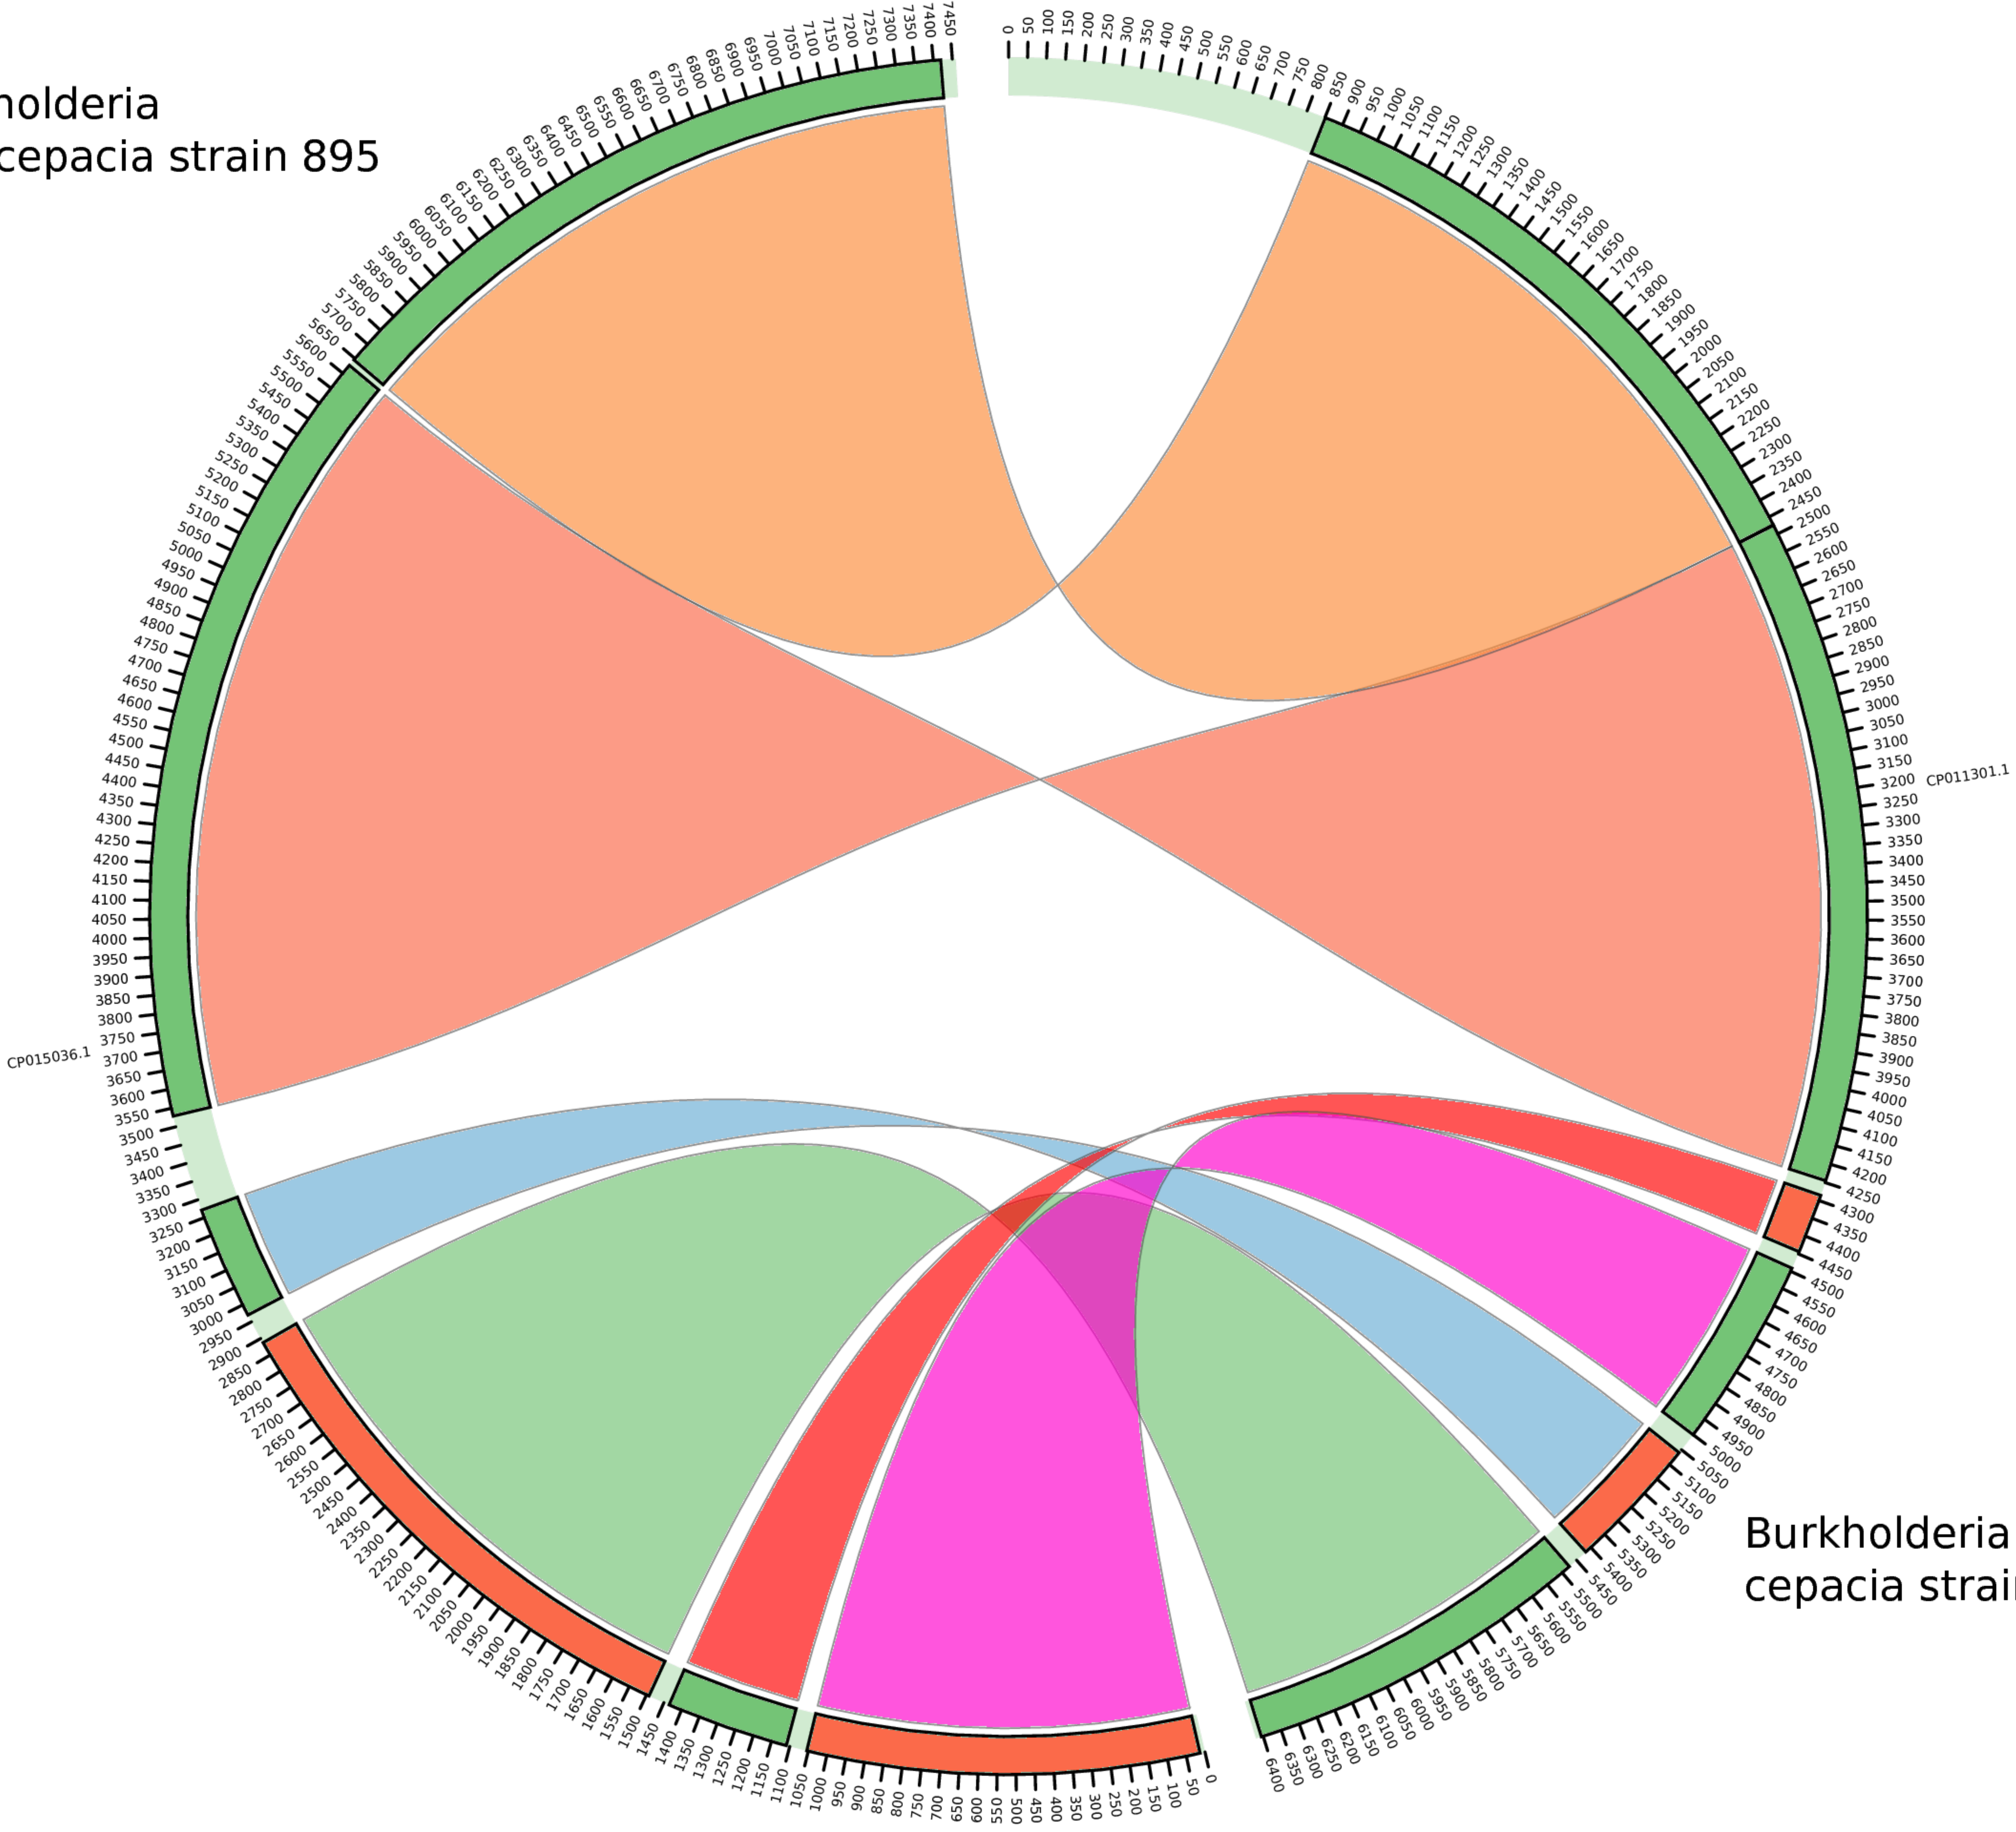

Burkholderia  
cepacia strain LO6
